# Supplementary material for: A comparison of magnetic resonance elastography (MRE) to biomarker testing for staging fibrosis in non-alcoholic fatty liver disease (NAFLD)
Source: PubMed Central journal article supplement — Transl Gastroenterol Hepatol. 2023 Jan 25;8:7. doi: 10.21037/tgh-22-27 (PMC9813653; doi:10.21037/tgh-22-27), 2023-01-25
Supplement: tgh-08-22-27-dss.pdf [file tgh-08-22-27-dss.pdf]

## Data Sharing Statement

|                     |                                                                                                                                                     |                                                                                                                                                                                                                                                              |
|---------------------|-----------------------------------------------------------------------------------------------------------------------------------------------------|--------------------------------------------------------------------------------------------------------------------------------------------------------------------------------------------------------------------------------------------------------------|
| <b>Article Info</b> | <a href="https://dx.doi.org/10.21037/tgh-22-27">https://dx.doi.org/10.21037/tgh-22-27</a>                                                           |                                                                                                                                                                                                                                                              |
| <b>Item</b>         | <b>Question</b>                                                                                                                                     | <b>Authors' Response<br/>(place "-" if not applicable)</b>                                                                                                                                                                                                   |
| 1                   | Would you like to share data collected for your study to others?                                                                                    | We do not feel that it would be ethical to share our original data as it contains patient identifiable information. We have provided 5 data tables for publication which contain all of the information that was used for statistical analysis in our study. |
| 2                   | If not, would you like to share the reason for your decision?                                                                                       | See above.                                                                                                                                                                                                                                                   |
| 3                   | What data in particular will be shared?                                                                                                             | -                                                                                                                                                                                                                                                            |
| 4                   | Any other documents will be shared? Such as study protocol, statistical analysis plan, informed consent form, clinical study report, analytic code. | -                                                                                                                                                                                                                                                            |
| 5                   | When will data availability begin?                                                                                                                  | -                                                                                                                                                                                                                                                            |
| 6                   | When will data availability end?                                                                                                                    | -                                                                                                                                                                                                                                                            |
| 7                   | To whom will you share the data?                                                                                                                    | -                                                                                                                                                                                                                                                            |
| 8                   | For what type of analysis or purpose?                                                                                                               | -                                                                                                                                                                                                                                                            |
| 9                   | How or where can the data/ documents be obtained?                                                                                                   | -                                                                                                                                                                                                                                                            |
| 10                  | Any other restrictions?                                                                                                                             | -                                                                                                                                                                                                                                                            |
